# Supplementary material for: Molecular hydrogen increases resilience to stress in mice
Source: Springer Nature journal article supplement (doi:10.1038/s41598-017-10362-6), 2017-08-22
Supplement: 41598_2017_10362_MOESM1_ESM.pdf [file 41598_2017_10362_MOESM1_ESM.pdf]

## Supplementary Data

Revised submission for SREP-16-34229D

July 28, 2017

# Molecular hydrogen increases resilience to stress in mice

Qiang Gao<sup>1#</sup>, Han Song<sup>2#</sup>, Xiao-ting Wang<sup>2#</sup>, Ying Liang<sup>2</sup>, Yan-jie Xi<sup>2</sup>, Yuan Gao<sup>2</sup>,  
Qing-jun Guo<sup>3</sup>, Tyler LeBaron<sup>4</sup>, Yi-xiao Luo<sup>5</sup>, Shuang-cheng Li<sup>6\*</sup>, Xi Yin<sup>7</sup>, Hai-shui

Shi<sup>2\*</sup>, Yu-xia Ma<sup>1</sup>

<sup>1</sup>Department of Nutrition, Hebei Medical University, Shijiazhuang, 050017, China; <sup>2</sup>Department of Biochemistry and Molecular Biology, Hebei Medical University, Shijiazhuang, 050017, China; <sup>3</sup>Department of Surgery, Hebei Medical University, Shijiazhuang, 050017, China; <sup>4</sup>Molecular Hydrogen Foundation, Kissimmee FL, 34744, USA; <sup>5</sup>Department of Pharmacology, Medical School of Hunan Normal University, Changsha, 410013, China; <sup>6</sup>Department of Human Anatomy, Hebei Medical University, Shijiazhuang, 050017, China; <sup>7</sup>Department of Functional region of Diagnosis, Hebei Medical University Fourth Hospital, Hebei Medical University, Shijiazhuang 050011, China

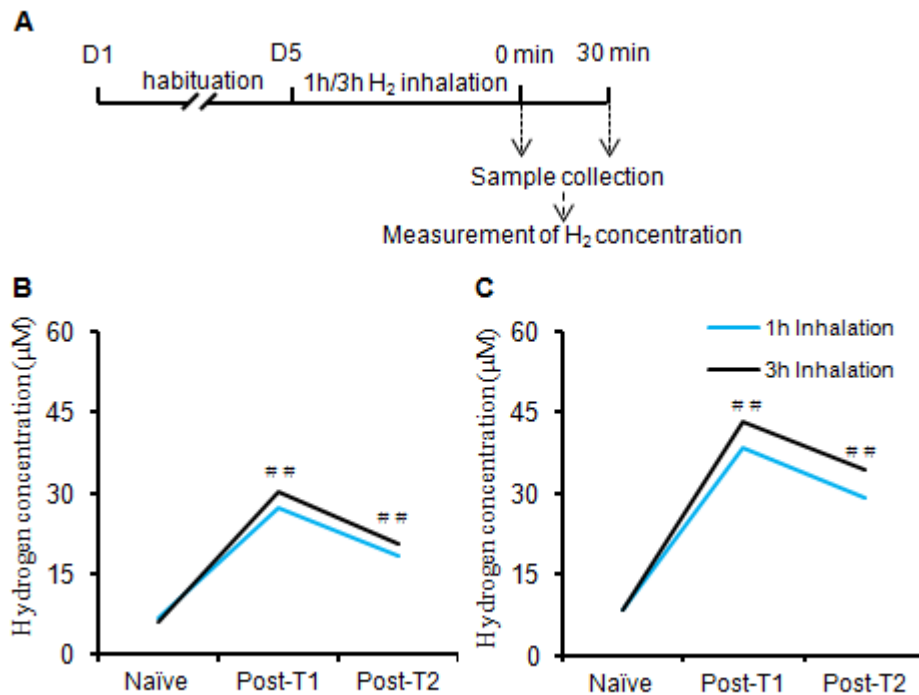

**Supplementary Figure 1.** Measurement of H<sub>2</sub> concentration in the blood and hippocampus of mice exposed to H<sub>2</sub> inhalation.

Molecular hydrogen (H<sub>2</sub>) present in water or organs of mice was measured using a needle-type Hydrogen Sensor (Unisense A/S, Aarhus, Denmark) following the method published by Hayashida et al<sup>[1]</sup>. **(A)** Experimental procedure. After a 5-day adaption period, mice were randomly divided into three groups (n=10 in each group). Two groups of mice were exposed to H<sub>2</sub>/O<sub>2</sub> mixture gas in a transparent closed box (20×18×15-cm, length × width × height) for 1h or 3h. Mice in naive group were kept in the treatment room without any treatment. The hippocampus and blood of all mice were collected immediately or 30 min after H<sub>2</sub> exposure. Measurement of H<sub>2</sub> were conducted based on previous investigation. H<sub>2</sub> concentration in the hippocampus **(B)** and blood **(C)** are significantly increased at both 0 min (Post-T1) and 30 min (Post-T2) after H<sub>2</sub>/O<sub>2</sub> mixture gas inhalation, compared with that of naive mice.

## Reference

- [1] Hayashida K, Sano M, Ohsawa I, *et al.* Inhalation of hydrogen gas reduces infarct size in the rat model of myocardial ischemia-reperfusion injury. *Biochem Biophys Res Commun.* 2008,373(1):30-5.
